# Supplementary material
Source: Research Square preprint supplement (doi:10.21203/rs.3.rs-9815809/v1)
Supplement: Supplementary file 1 [file 49924beb85619baf3b20bc1d.docx]

**Additional file 1.** Excel file containing proteomic datasets and clustering analyses associated with aging and cognitive decline.

Sheet 1. Proteins identified in the healthy aging cohort.

Sheet 2. Differentially expressed proteins between the younger (20–39 years) and middle-aged (40–59 years) groups.

Sheet 3. Differentially expressed proteins between the middle-aged (40–59 years) and older (60–79 years) groups.

Sheet 4. Differentially expressed proteins between the younger (20–39 years) and older (60–79 years) groups.

Sheet 5. Proteins consistently downregulated in both the middle-aged and older groups compared with the younger group.

Sheet 6. Proteins consistently downregulated in the older group compared with both the younger and middle-aged groups.

Sheet 7. Proteins consistently upregulated in the older group compared with both the younger and middle-aged groups.

Sheet 8. Clustering analysis data for age-associated plasma proteome changes in healthy individuals.

Sheet 9. Proteins identified in the cognitive decline cohort.

Sheet 10. Differentially expressed proteins between non-demented controls (NC) and patients with mild cognitive impairment (MCI).

Sheet 11. Differentially expressed proteins between non-demented controls (NC) and patients with Alzheimer’s disease (AD).

Sheet 12. Overlapping proteins significantly increased in both the MCI and AD groups compared with NC.

Sheet 13. Overlapping proteins significantly decreased in both the MCI and AD groups compared with NC.

Sheet 14. Candidate proteins associated with cognitive decline that have not been reported in previous plasma dementia studies.

Sheet 15. Clustering analysis data for plasma proteome changes associated with cognitive decline.

**Additional file 2.** Principal component analysis (PCA) of plasma proteomic profiles in the healthy aging and cognitive decline cohorts.
